# Supplementary material
Source: publisher site journal article supplement (https://www.spandidos-publications.com/6028/downloadSupplementary)
Supplement: Supplementary file 1 [file downloadSupplementary]

## Sheet: basal_A485_vs_con
Supplementary Table III: Downregulated genes in basal-like cell lines (PaTu-T, PANC-1, MIAPaCa-2) after 24h A485 (1µM) treatment compared to control-treated cell lines
n=120	BaseMean	log2Fold Change	lFCSE	Stat	P-value	Padj	Symbol
ENSG00000138434	3886.17	-0.48843	0.144534	-3.37935	0.000726586	0.0887009	ITPRID2
ENSG00000159216	766.019	-0.602521	0.171396	-3.51537	0.000439138	0.0588644	RUNX1
ENSG00000196141	4837.67	-0.649739	0.162301	-4.00329	6.24686e-05	0.0164992	SPATS2L
ENSG00000138162	1498.75	-0.660065	0.182208	-3.62259	0.000291664	0.0467608	TACC2
ENSG00000170921	1446.53	-0.666521	0.186963	-3.56498	0.000363877	0.052091	TANC2
ENSG00000186480	1599.58	-0.678154	0.169608	-3.99837	6.37812e-05	0.0164992	INSIG1
ENSG00000134369	728.004	-0.690996	0.181419	-3.80884	0.000139618	0.0266324	NAV1
ENSG00000058668	2347.62	-0.715006	0.172519	-4.14451	3.40537e-05	0.0106834	ATP2B4
ENSG00000168461	2359.46	-0.729548	0.208156	-3.50481	0.00045693	0.0596233	RAB31
ENSG00000069702	703.814	-0.76123	0.211457	-3.59993	0.000318302	0.0484899	TGFBR3
ENSG00000167601	1851.64	-0.795351	0.230335	-3.45302	0.000554341	0.0716996	AXL
ENSG00000112972	1592.33	-0.795792	0.233055	-3.41461	0.000638726	0.0804959	HMGCS1
ENSG00000137309	22148.8	-0.796689	0.235787	-3.37885	0.000727895	0.0887009	HMGA1
ENSG00000033867	2086.81	-0.801914	0.223336	-3.59061	0.000329904	0.0496371	SLC4A7
ENSG00000078269	842.627	-0.806636	0.192391	-4.19269	2.75669e-05	0.00967796	SYNJ2
ENSG00000144645	997.164	-0.818812	0.211585	-3.8699	0.000108879	0.023609	OSBPL10
ENSG00000197747	12897.8	-0.875824	0.259725	-3.37212	0.000745925	0.0892083	S100A10
ENSG00000072274	3978.4	-0.896985	0.247614	-3.62251	0.00029176	0.0467608	TFRC
ENSG00000164442	1983.96	-0.901683	0.257218	-3.50552	0.000455711	0.0596233	CITED2
ENSG00000170485	2189.72	-0.906076	0.216682	-4.18159	2.89481e-05	0.00968712	NPAS2
ENSG00000187720	405.984	-0.926111	0.258597	-3.58129	0.000341904	0.0509229	THSD4
ENSG00000157557	1151.51	-0.929466	0.252501	-3.68103	0.000232291	0.038922	ETS2
ENSG00000101384	1180.92	-0.937549	0.278785	-3.36298	0.000771068	0.0909552	JAG1
ENSG00000182022	501.576	-0.945764	0.246218	-3.84117	0.00012245	0.0251391	CHST15
ENSG00000169710	4178.79	-0.951879	0.245603	-3.87567	0.00010633	0.0234006	FASN
ENSG00000173334	202.277	-0.953229	0.268211	-3.55403	0.000379375	0.0537874	TRIB1
ENSG00000171621	219.208	-0.965773	0.241518	-3.99876	6.36756e-05	0.0164992	SPSB1
ENSG00000158710	3950.58	-0.966834	0.274299	-3.52475	0.000423887	0.0578723	TAGLN2
ENSG00000169991	223.726	-0.974042	0.272251	-3.57774	0.000346579	0.051103	IFFO2
ENSG00000171517	342.567	-1.00993	0.284593	-3.5487	0.000387135	0.0543647	LPAR3
ENSG00000127124	398.929	-1.0155	0.26356	-3.85301	0.000116676	0.0249331	HIVEP3
ENSG00000197457	330.72	-1.02464	0.291347	-3.5169	0.000436614	0.0588644	STMN3
ENSG00000138678	972.839	-1.03101	0.28277	-3.64611	0.000266236	0.0441084	GPAT3
ENSG00000134324	1360.43	-1.0347	0.211332	-4.89608	9.77689e-07	0.000655274	LPIN1
ENSG00000135074	91.7263	-1.04777	0.309475	-3.38565	0.000710108	0.0879877	ADAM19
ENSG00000177606	896.486	-1.04969	0.245146	-4.2819	1.85308e-05	0.00666431	JUN
ENSG00000116717	263.824	-1.07967	0.247544	-4.36154	1.29153e-05	0.00501146	GADD45A
ENSG00000146072	651.696	-1.08157	0.215142	-5.02725	4.97557e-07	0.000386131	TNFRSF21
ENSG00000156463	325.567	-1.13672	0.283734	-4.00628	6.16814e-05	0.0164992	SH3RF2
ENSG00000111057	8757.93	-1.1971	0.318172	-3.76242	0.000168275	0.0298941	KRT18
ENSG00000124762	555.11	-1.20656	0.335048	-3.60117	0.000316793	0.0484899	CDKN1A
ENSG00000170421	2582.07	-1.21755	0.297453	-4.09326	4.25353e-05	0.0125436	KRT8
ENSG00000140332	270.425	-1.22739	0.308324	-3.98083	6.8676e-05	0.0166005	TLE3
ENSG00000185567	1658.63	-1.24029	0.211682	-5.85922	4.65058e-09	8.57159e-06	AHNAK2
ENSG00000008517	607.363	-1.25272	0.322308	-3.88672	0.00010161	0.0227005	IL32
ENSG00000127824	186.626	-1.25294	0.311087	-4.02761	5.63471e-05	0.0156762	TUBA4A
ENSG00000175505	81.0688	-1.26056	0.329067	-3.83072	0.00012777	0.0258078	CLCF1
ENSG00000188042	1807.29	-1.26257	0.252781	-4.99472	5.89214e-07	0.000434398	ARL4C
ENSG00000048052	408.522	-1.30589	0.347904	-3.75361	0.000174307	0.030597	HDAC9
ENSG00000026508	34896.8	-1.30818	0.24265	-5.3912	6.99899e-08	6.88001e-05	CD44
ENSG00000080031	261.018	-1.34526	0.27405	-4.9088	9.16334e-07	0.000643397	PTPRH
ENSG00000164674	204.664	-1.35017	0.370737	-3.64185	0.000270686	0.0443474	SYTL3
ENSG00000171617	813.101	-1.35312	0.253197	-5.34416	9.08372e-08	7.87879e-05	ENC1
ENSG00000029534	434.202	-1.35605	0.307549	-4.40923	1.03738e-05	0.00437033	ANK1
ENSG00000099250	917.962	-1.38626	0.315196	-4.3981	1.09203e-05	0.00446153	NRP1
ENSG00000001617	447.768	-1.38673	0.322402	-4.30123	1.69856e-05	0.0062613	SEMA3F
ENSG00000133816	960.374	-1.39028	0.286138	-4.85878	1.1811e-06	0.000757186	MICAL2
ENSG00000013588	8466.12	-1.39061	0.242526	-5.73385	9.81743e-09	1.60842e-05	GPRC5A
ENSG00000175745	1145.25	-1.39965	0.247175	-5.6626	1.49097e-08	2.19843e-05	NR2F1
ENSG00000106003	72.8118	-1.40021	0.410023	-3.41495	0.000637948	0.0804959	LFNG
ENSG00000133216	315.66	-1.40198	0.368301	-3.80661	0.000140884	0.0266324	EPHB2
ENSG00000169129	552.989	-1.40651	0.398448	-3.52999	0.00041558	0.0578087	AFAP1L2
ENSG00000144824	548.658	-1.41809	0.339517	-4.1768	2.95639e-05	0.00968712	PHLDB2
ENSG00000198959	4367.79	-1.42797	0.212184	-6.72985	1.69842e-11	5.00865e-08	TGM2
ENSG00000167680	443.203	-1.45016	0.335556	-4.32165	1.54869e-05	0.00585524	SEMA6B
ENSG00000188112	127.788	-1.46049	0.405299	-3.60348	0.000313983	0.0484899	C6orf132
ENSG00000122035	692.049	-1.46533	0.392593	-3.73244	0.000189636	0.0328962	RASL11A
ENSG00000071575	688.119	-1.47115	0.359039	-4.09746	4.17704e-05	0.0125436	TRIB2
ENSG00000128567	3632.14	-1.48455	0.330214	-4.49574	6.93296e-06	0.00329763	PODXL
ENSG00000146674	97.8968	-1.50876	0.405828	-3.71774	0.000201013	0.0342423	IGFBP3
ENSG00000108175	673.798	-1.5129	0.200638	-7.54045	4.68349e-14	3.4529e-10	ZMIZ1
ENSG00000118515	4001.51	-1.51787	0.450335	-3.37054	0.000750209	0.0892083	SGK1
ENSG00000132470	1292.22	-1.54512	0.323934	-4.76987	1.84347e-06	0.00100674	ITGB4
ENSG00000136826	523.84	-1.5541	0.353792	-4.39269	1.11954e-05	0.00446153	KLF4
ENSG00000160712	84.8338	-1.57482	0.356089	-4.42255	9.75415e-06	0.00423014	IL6R
ENSG00000150687	2851.17	-1.57889	0.285076	-5.53847	3.05122e-08	3.46079e-05	PRSS23
ENSG00000249850	51.7281	-1.59666	0.452822	-3.52602	0.000421857	0.0578723	KRT18P31
ENSG00000172927	324.51	-1.61237	0.477524	-3.37652	0.000734096	0.0887234	MYEOV
ENSG00000066248	320.441	-1.61474	0.41475	-3.89328	9.88989e-05	0.0224348	NGEF
ENSG00000115648	49.9961	-1.61808	0.453687	-3.5665	0.000361775	0.052091	MLPH
ENSG00000141753	248.116	-1.64825	0.434421	-3.79414	0.000148159	0.0274345	IGFBP4
ENSG00000171345	2220.06	-1.72232	0.324473	-5.30806	1.10799e-07	9.07631e-05	KRT19
ENSG00000174791	108.292	-1.74097	0.431466	-4.03502	5.45973e-05	0.0154815	RIN1
ENSG00000099812	135.389	-1.74272	0.509466	-3.42069	0.000624631	0.0800886	MISP
ENSG00000087510	65.5178	-1.7457	0.522061	-3.34387	0.000826185	0.0966833	TFAP2C
ENSG00000137501	367.888	-1.78187	0.479455	-3.71645	0.00020204	0.0342423	SYTL2
ENSG00000101096	522.924	-1.78366	0.447974	-3.9816	6.84523e-05	0.0166005	NFATC2
ENSG00000171951	7157.13	-1.82004	0.38416	-4.73772	2.1614e-06	0.00113821	SCG2
ENSG00000169184	55.4049	-1.83494	0.462014	-3.97161	7.1389e-05	0.0169779	MN1
ENSG00000117472	1113.14	-1.85432	0.272405	-6.8072	9.95198e-12	3.66855e-08	TSPAN1
ENSG00000120708	2515.82	-1.93232	0.297723	-6.49034	8.56434e-11	2.10469e-07	TGFBI
ENSG00000168306	447.311	-1.94447	0.464873	-4.1828	2.87942e-05	0.00968712	ACOX2
ENSG00000188910	210.213	-1.96079	0.514121	-3.81387	0.00013681	0.0266324	GJB3
ENSG00000058085	174.378	-1.98001	0.501815	-3.94569	7.95702e-05	0.0183322	LAMC2
ENSG00000167767	292.78	-1.9851	0.369117	-5.37796	7.53351e-08	6.9426e-05	KRT80
ENSG00000171346	77.6015	-1.988	0.526751	-3.77407	0.000160603	0.0291541	KRT15
ENSG00000143127	40.3164	-1.99627	0.519787	-3.84056	0.000122755	0.0251391	ITGA10
ENSG00000107984	3467.35	-2.04407	0.287373	-7.11295	1.13587e-12	5.58281e-09	DKK1
ENSG00000183691	84.8577	-2.04495	0.542181	-3.77171	0.000162132	0.0291541	NOG
ENSG00000087245	1085.03	-2.05479	0.520742	-3.94588	7.95066e-05	0.0183322	MMP2
ENSG00000172137	2231.64	-2.07486	0.434602	-4.77416	1.80455e-06	0.00100674	CALB2
ENSG00000147573	345.938	-2.08923	0.52442	-3.98389	6.7797e-05	0.0166005	TRIM55
ENSG00000108846	199.573	-2.13447	0.379526	-5.62404	1.8654e-08	2.50048e-05	ABCC3
ENSG00000124225	254.055	-2.14243	0.560071	-3.82528	0.000130623	0.0260275	PMEPA1
ENSG00000164761	112.961	-2.16057	0.562214	-3.84297	0.000121553	0.0251391	TNFRSF11B
ENSG00000189410	46.213	-2.16209	0.465983	-4.63985	3.48667e-06	0.0017137	SH2D5
ENSG00000189120	34.1699	-2.18094	0.547663	-3.98226	6.82617e-05	0.0166005	SP6
ENSG00000196878	172.161	-2.20062	0.530259	-4.15009	3.32352e-05	0.0106533	LAMB3
ENSG00000113140	203.917	-2.23307	0.403128	-5.53936	3.03583e-08	3.46079e-05	SPARC
ENSG00000118257	26.1308	-2.32633	0.651505	-3.5707	0.000356034	0.0519775	NRP2
ENSG00000166920	311.818	-2.33984	0.395018	-5.92337	3.15403e-09	6.64373e-06	C15orf48
ENSG00000039068	74.6736	-2.35836	0.618757	-3.81145	0.000138155	0.0266324	CDH1
ENSG00000183454	349.38	-2.50496	0.560243	-4.4712	7.7783e-06	0.00347549	GRIN2A
ENSG00000197249	27.0214	-2.52711	0.702099	-3.59937	0.000318991	0.0484899	SERPINA1
ENSG00000170961	56.9805	-2.57615	0.634071	-4.06287	4.84735e-05	0.0140145	HAS2
ENSG00000170214	69.6311	-2.80692	0.679648	-4.12996	3.6282e-05	0.0111454	ADRA1B
ENSG00000113578	34.6145	-3.09024	0.65548	-4.71446	2.4235e-06	0.00123223	FGF1
ENSG00000131771	136.744	-3.1407	0.647964	-4.84702	1.25329e-06	0.000769988	PPP1R1B
ENSG00000205336	196.99	-3.19287	0.407098	-7.843	4.39895e-15	6.48625e-11	ADGRG1
ENSG00000137440	74.3774	-3.396	0.708032	-4.79639	1.61551e-06	0.00095283	FGFBP1
